# Supplementary material
Source: publisher figshare collection journal article supplement (https://gsajournals.figshare.com/ndownloader/files/13192280)
Supplement: Supplementary file 1 [file 13192280]

| **Splice site strength** | **Degree of retention (expressed as PSI)** |
| --- | --- |
| **A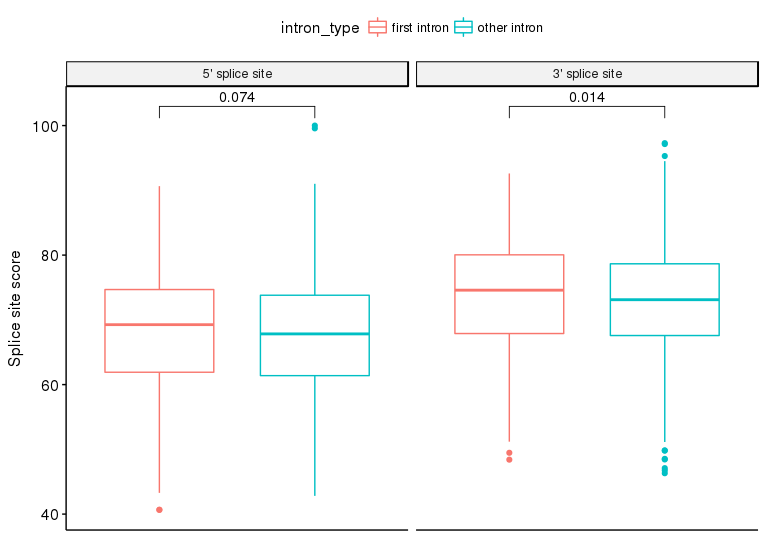** | **B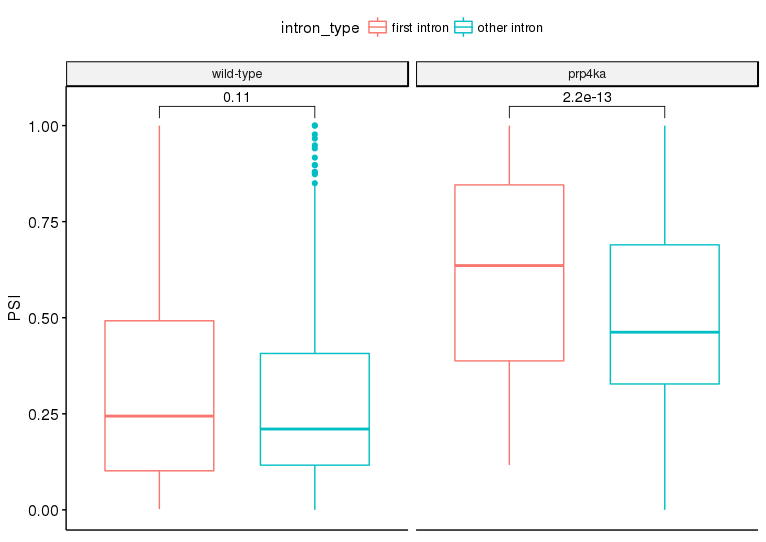** |
| **C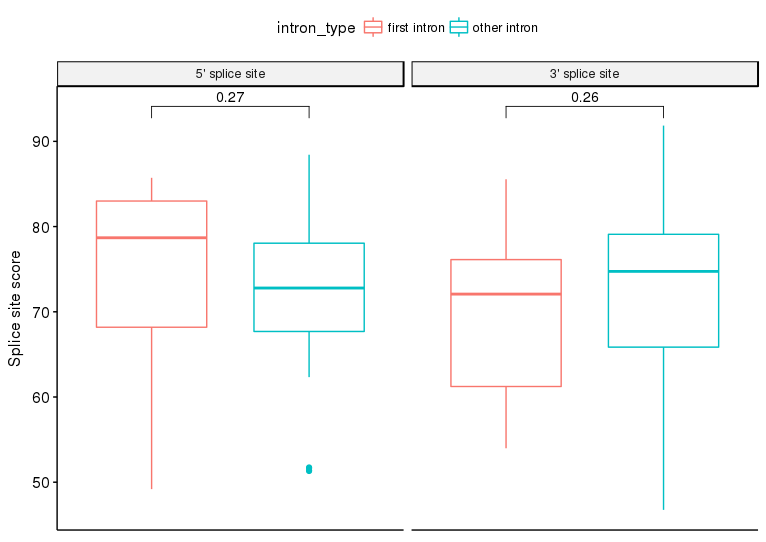** | **D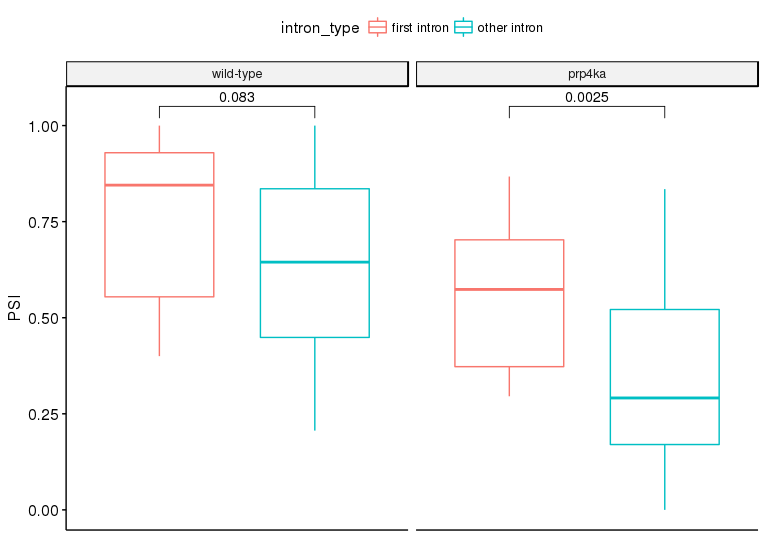** |
| **E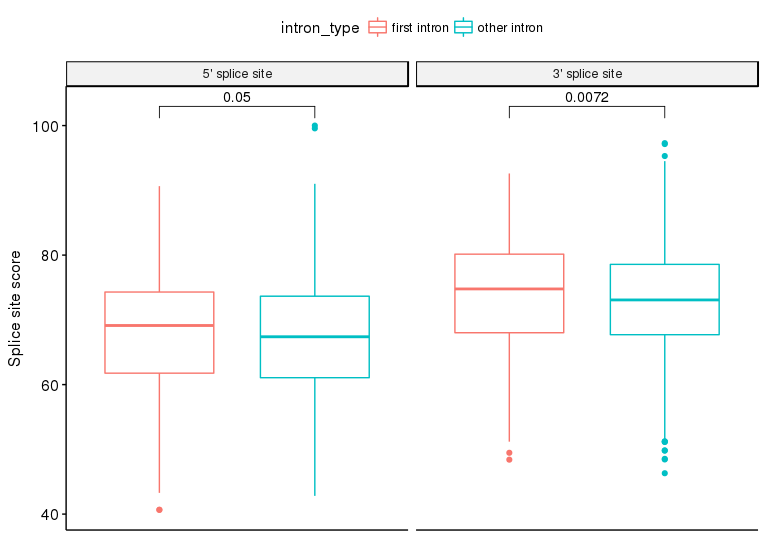** | **F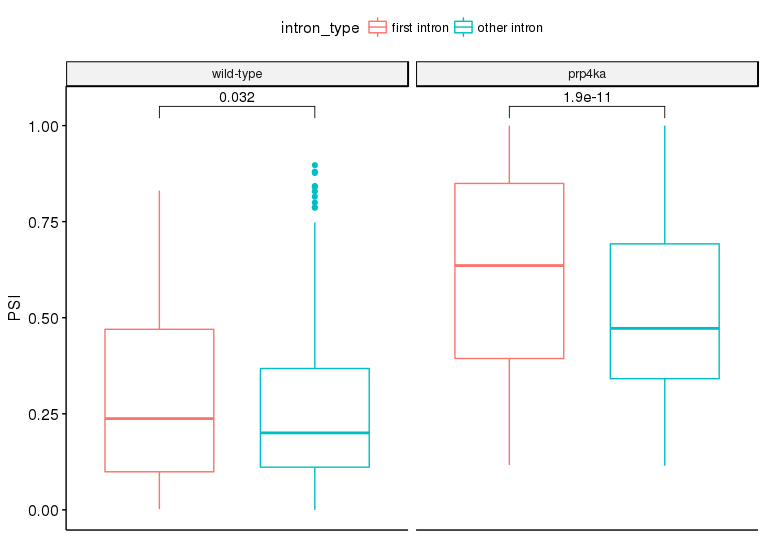** |
| **Figure S9: First intron splicing in wild-type and the *prp4ka* mutant.** The splice site scores of both the 5’ and 3’ splice sites (left column) and the degree of retention (represented by PSI, Percent Spliced In, values; right column) were compared for the first introns versus all other retained introns (A and B). Additionally, comparisons were made for introns less retained in *prp4ka* (C and D) and introns more retained in *prp4ka* (E and F). Significance values were derived from applying Wilcoxon tests to the different groups. | |
